# Supplementary material for: The CD47-binding peptide of thrombospondin-1 induces defenestration of liver sinusoidal endothelial cells
Source: PubMed Central journal article supplement — Liver Int. 2013 Jun 26;33(9):1386–97. doi: 10.1111/liv.12231 (PMC4285809; doi:10.1111/liv.12231), 2013-06-26
Supplement: liv0033-1386-SD1.pdf [file liv0033-1386-SD1.pdf]

## Supplementary Figure 1

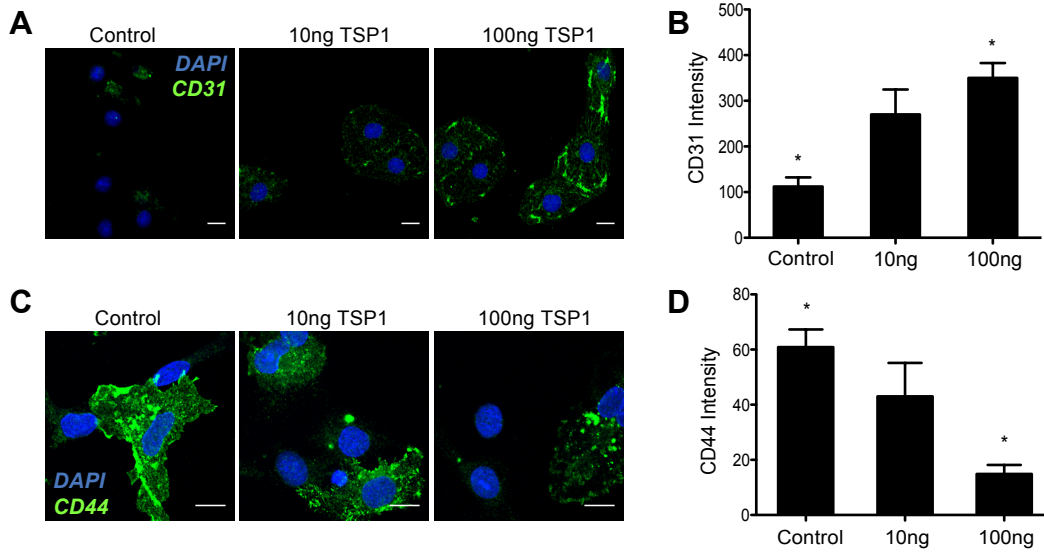

**Figure S1. The effect of TSP1 on LSEC markers.** LSECs were treated with 10ng or 100ng TSP1 overnight (scale bar, 10 $\mu$ m). (A) Representative images of CD31 immuno-fluorescence (green) with increasing doses of TSP1. (B) Quantification of CD31 fluorescence intensity. There is significant increase in CD31 expression after TSP1 treatment. (C) Representative images of CD44 immuno-fluorescence (green) with increasing doses of TSP1. (D) Quantification of CD44 fluorescence intensity. There is significant decrease in CD44 expression after TSP1 treatment. (\* represents p-value < 0.05, n=3).
